# Supplementary material for: Automatic segmentation of human knee anatomy by a convolutional neural network applying a 3D MRI protocol
Source: PubMed Central journal article supplement (PMC9847207; doi:10.1186/s12891-023-06153-y), 2023-01-18
Supplement: 12891_2023_6153_MOESM1_ESM.pdf [file 12891_2023_6153_MOESM1_ESM.pdf]

# 1 Supplementary materials

|                     | T1                | T1FS              | T1FS              | T1PDFS            |
|---------------------|-------------------|-------------------|-------------------|-------------------|
| Bone medulla        | $0.992 \pm 0.001$ | $0.994 \pm 0.001$ | $0.939 \pm 0.049$ | $0.994 \pm 0.001$ |
| PCL                 | $0.813 \pm 0.058$ | $0.928 \pm 0.011$ | $0.795 \pm 0.087$ | $0.868 \pm 0.020$ |
| ACL                 | $0.749 \pm 0.111$ | $0.881 \pm 0.023$ | $0.804 \pm 0.075$ | $0.870 \pm 0.029$ |
| Muscle              | $0.939 \pm 0.011$ | $0.978 \pm 0.001$ | $0.970 \pm 0.006$ | $0.982 \pm 0.001$ |
| Cartilage           | $0.809 \pm 0.028$ | $0.914 \pm 0.008$ | $0.855 \pm 0.041$ | $0.928 \pm 0.004$ |
| Bone cortex         | $0.856 \pm 0.010$ | $0.910 \pm 0.007$ | $0.776 \pm 0.068$ | $0.910 \pm 0.009$ |
| Artery              | $0.733 \pm 0.034$ | $0.835 \pm 0.033$ | $0.751 \pm 0.058$ | $0.817 \pm 0.034$ |
| Collateral ligament | $0.654 \pm 0.036$ | $0.751 \pm 0.052$ | $0.439 \pm 0.129$ | $0.675 \pm 0.084$ |
| Tendon              | $0.761 \pm 0.020$ | $0.887 \pm 0.012$ | $0.706 \pm 0.059$ | $0.894 \pm 0.018$ |
| Meniscus            | $0.805 \pm 0.035$ | $0.892 \pm 0.021$ | $0.876 \pm 0.027$ | $0.907 \pm 0.019$ |
| Adipose tissue      | $0.913 \pm 0.025$ | $0.963 \pm 0.008$ | $0.919 \pm 0.025$ | $0.972 \pm 0.006$ |
| Vein                | $0.408 \pm 0.022$ | $0.718 \pm 0.015$ | $0.665 \pm 0.031$ | $0.734 \pm 0.016$ |
| Nerve               | $0.618 \pm 0.119$ | $0.766 \pm 0.054$ | $0.636 \pm 0.066$ | $0.804 \pm 0.045$ |

Supplementary Table 1: Mean DSC  $\pm$  standard deviation of the respective image channel combinations for each individual anatomical class at 21,000 iterations

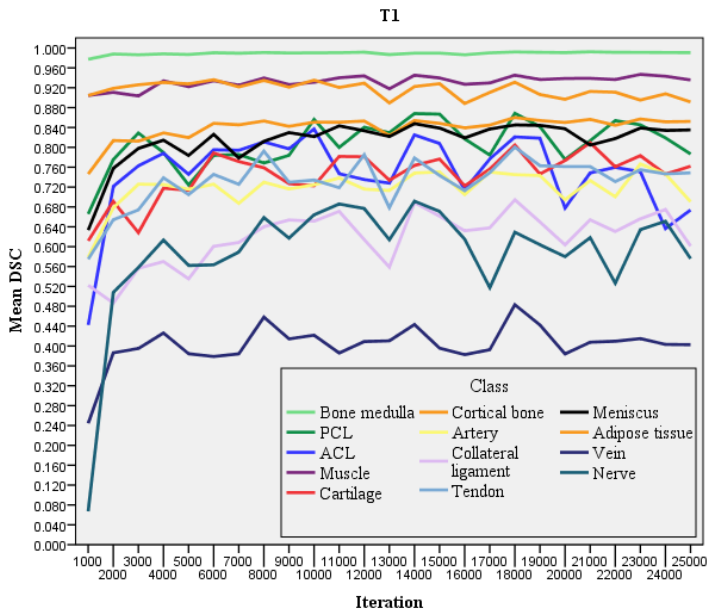

(a) Training T1 alone

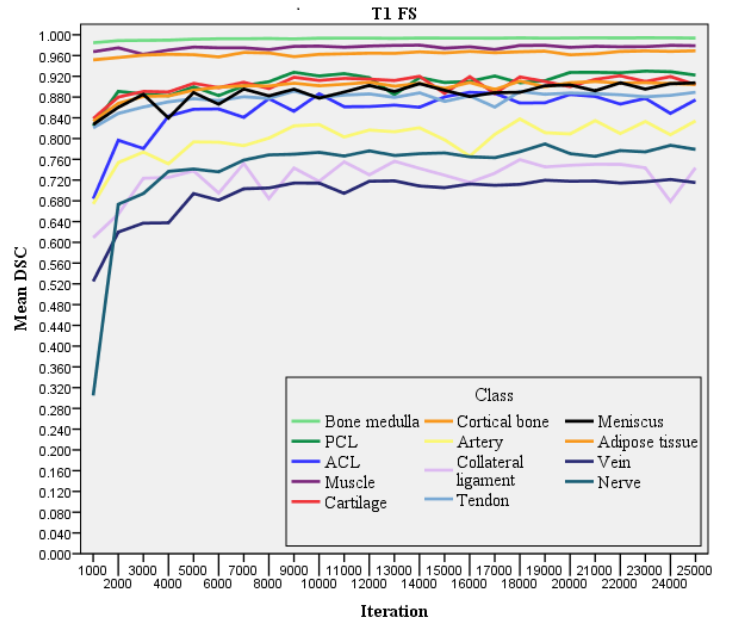

(b) Combining T1 & FS

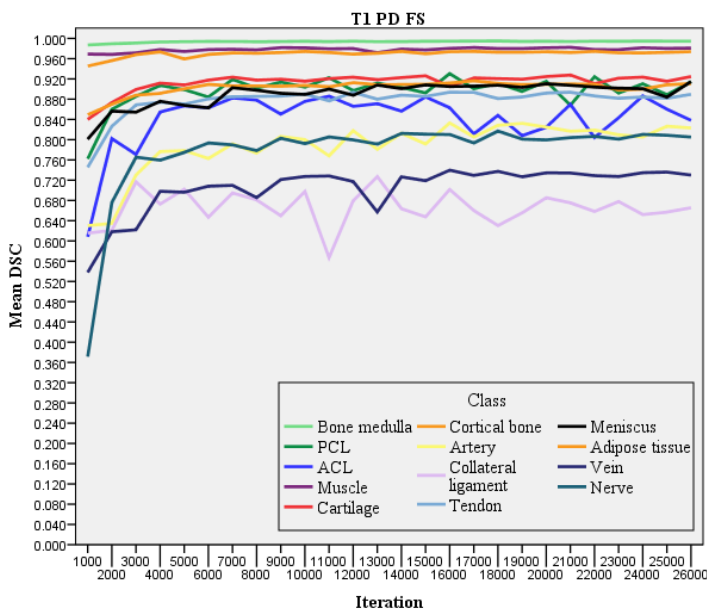

(c) T1, PD & FS combination

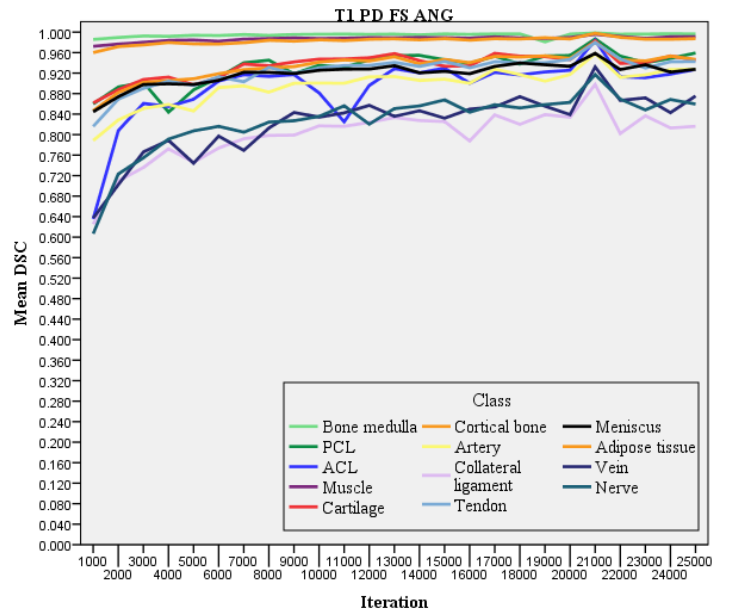

(d) All the channels T1, PD, FS, Angio together.

Supplementary Figure 1: Validation curves of the DSC obtained during training for (a) Training T1 alone, (b) combining T1 & FS (c) T1, PD & FS combination and (d) all the channels T1, PD, FS, Angio together.
